# Supplementary material
Source: PubMed Central journal article supplement (PMC3127260)
Supplement: NIHMS104029-supplement-1_si_001.pdf [file NIHMS104029-supplement-1_si_001.pdf]

## Supporting Information

for

# Spectroscopic and Computational Characterization of the Base-off Forms of Cob(II)alamin

*Matthew D. Liptak, Angela S. Fleischhacker, Rowena G. Matthews, Joshua Telser, and*

*Thomas C. Brunold*

### Contents

|                      |                                                                      |    |
|----------------------|----------------------------------------------------------------------|----|
| <b>Tables S1-S4</b>  | EPR simulation parameters                                            | S2 |
| <b>Figures S1-S2</b> | Gaussian deconvolutions of base-off Co <sup>2+</sup> Cbl MCD spectra | S3 |
| <b>Tables S5-S6</b>  | Fit parameters from spectral deconvolutions                          | S3 |
| <b>Figure S3</b>     | VTVH MCD data of four-coordinate base-off Co <sup>2+</sup> Cbl       | S4 |
| <b>Table S7</b>      | VTVH MCD data fit parameters                                         | S4 |
| <b>Tables S8-S9</b>  | Cartesian coordinates of all computational models                    | S4 |

**Table S1.** Parameters obtained from a fit of the X-Band EPR spectrum of five-coordinate base-off  $\text{Co}^{2+}\text{Cbl}$

|   | $g$   | $A (^{59}\text{Co})$ | width | $g$ -strain | $A$ -strain |
|---|-------|----------------------|-------|-------------|-------------|
| 1 | 2.382 | 206                  | 20    | 0.068       | 0.209       |
| 2 | 2.302 | 229                  | 22    | 0.300       | -0.185      |
| 3 | 1.992 | 392                  | 19    | -0.102      | -0.025      |

**Table S2.** Parameters obtained from a fit of the Q-Band EPR spectrum of five-coordinate base-off  $\text{Co}^{2+}\text{Cbl}$

|   | $g$   | $A (^{59}\text{Co})$ | width | $g$ -strain | $A$ -strain |
|---|-------|----------------------|-------|-------------|-------------|
| 1 | 2.382 | 206                  | 55    | 0.062       | 0.210       |
| 2 | 2.302 | 229                  | 52    | 0.041       | 0.088       |
| 3 | 1.992 | 392                  | 57    | 0.291       | 0.097       |

**Table S3.** Parameters obtained from a fit of the X-Band EPR spectrum of four-coordinate base-off  $\text{Co}^{2+}\text{Cbl}$

|   | $g$   | $A (^{59}\text{Co})$ | width | $g$ -strain | $A$ -strain |
|---|-------|----------------------|-------|-------------|-------------|
| 1 | 2.814 | 695                  | 24    | 0.168       | 0.187       |
| 2 | 2.534 | 556                  | 16    | 0.032       | 0.050       |
| 3 | 1.935 | 495                  | 20    | 0.048       | 0.022       |

**Table S4.** Parameters obtained from a fit of the Q-Band EPR spectrum of four-coordinate base-off  $\text{Co}^{2+}\text{Cbl}$

|   | $g$   | $A (^{59}\text{Co})$ | width | $g$ -strain | $A$ -strain |
|---|-------|----------------------|-------|-------------|-------------|
| 1 | 2.814 | 695                  | 50    | 0.071       | 0.086       |
| 2 | 2.534 | 556                  | 50    | 0.030       | 0.041       |
| 3 | 1.935 | 495                  | 53    | 0.131       | 0.057       |

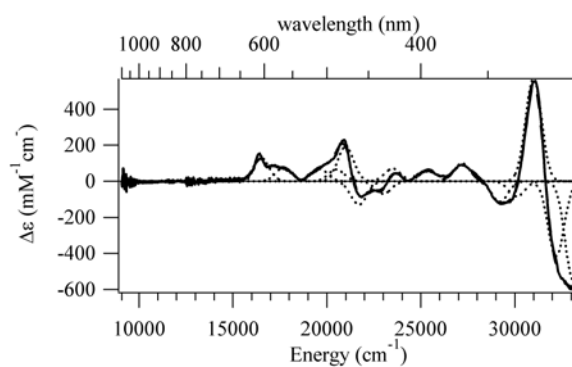

**Figure S1.** Gaussian deconvolution of the five-coordinate base-off  $\text{Co}^{2+}\text{Cbl}$  MCD spectrum obtained at 2K.

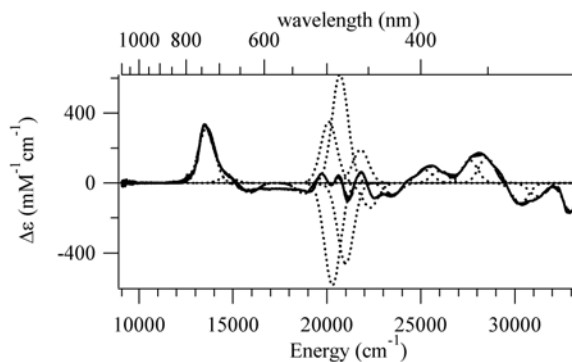

**Figure S2.** Gaussian deconvolution of the four-coordinate base-off  $\text{Co}^{2+}\text{Cbl}$  MCD spectrum obtained at 2K.

**Table S5.** Parameters obtained from the Gaussian deconvolution of the five-coordinate base-off  $\text{Co}^{2+}\text{Cbl}$  MCD spectrum (Figure S1)

| Band | Energy ( $\text{cm}^{-1}$ ) | $\Delta\epsilon$ ( $\text{M}^{-1}\text{cm}^{-1}$ ) | Width ( $\text{cm}^{-1}$ ) |
|------|-----------------------------|----------------------------------------------------|----------------------------|
| 1    | 16500                       | 125                                                | 1000                       |
| 2    | 17700                       | 75                                                 | 1000                       |
| 3    | 19600                       | 70                                                 | 1000                       |
| 4    | 20500                       | 65                                                 | 1000                       |
| 5    | 21000                       | 190                                                | 1000                       |
| 6    | 21700                       | -130                                               | 1000                       |
| 7    | 23000                       | -70                                                | 1000                       |
| 8    | 23500                       | 70                                                 | 1000                       |
| 9    | 25400                       | 65                                                 | 1000                       |
| 10   | 27200                       | 100                                                | 1000                       |
| 11   | 29200                       | -115                                               | 1000                       |
| 12   | 30100                       | -85                                                | 1000                       |
| 13   | 31000                       | 570                                                | 1000                       |
| 14   | 32200                       | -415                                               | 1000                       |
| 15   | 33100                       | -545                                               | 1000                       |

**Table S6.** Parameters obtained from the Gaussian deconvolution of the four-coordinate base-off  $\text{Co}^{2+}\text{Cbl}$  MCD spectrum (Figure S2)

| Band | Energy ( $\text{cm}^{-1}$ ) | $\Delta\epsilon$ ( $\text{M}^{-1}\text{cm}^{-1}$ ) | Width ( $\text{cm}^{-1}$ ) |
|------|-----------------------------|----------------------------------------------------|----------------------------|
| 1    | 13600                       | 315                                                | 1000                       |
| 2    | 14700                       | 35                                                 | 1000                       |
| 3    | 15900                       | -55                                                | 1000                       |
| 4    | 18800                       | -60                                                | 1000                       |
| 5    | 20100                       | 350                                                | 1000                       |
| 6    | 20300                       | -585                                               | 1000                       |
| 7    | 20700                       | 620                                                | 1000                       |
| 8    | 21000                       | -460                                               | 1000                       |
| 9    | 21800                       | 190                                                | 1000                       |
| 10   | 22300                       | -140                                               | 1000                       |
| 11   | 23500                       | -65                                                | 1000                       |
| 12   | 25200                       | 75                                                 | 1000                       |
| 13   | 26000                       | 70                                                 | 1000                       |
| 14   | 27600                       | 130                                                | 1000                       |
| 15   | 28500                       | 145                                                | 1000                       |
| 16   | 30300                       | -115                                               | 1000                       |
| 17   | 31200                       | -75                                                | 1000                       |
| 18   | 33000                       | -165                                               | 1000                       |

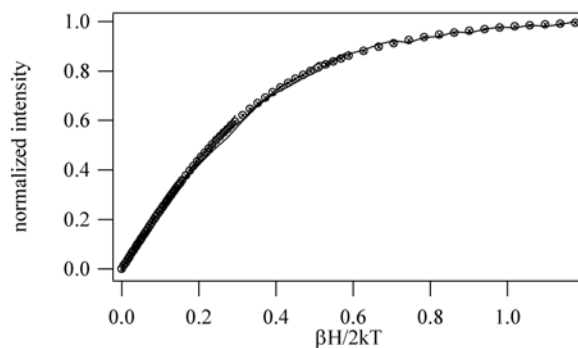

**Figure S3.** Experimental (solid line) and simulated (marks) VTVH MCD data at 2, 4, and 8 K for the 742 nm feature of four-coordinate, base-off  $\text{Co}^{2+}\text{Cbl}$ .

**Table S7.** VTVH MCD data fit parameters for the 742 feature of four-coordinate, base-off  $\text{Co}^{2+}\text{Cbl}$

|                        | 1     | 2     | 3     |
|------------------------|-------|-------|-------|
| $g$ value <sup>a</sup> | 2.81  | 2.53  | 1.94  |
| Polarization           | 26.3% | 11.7% | 62.0% |

<sup>a</sup>  $g$  values taken from the fit of the EPR spectra of four-coordinate, base-off  $\text{Co}^{2+}\text{Cbl}$  (Tables S3 and S4)

**Table S8.** PBE/TZP-optimized Cartesian coordinates of five-coordinate base-off Co<sup>2+</sup>Cbl

|    |           |           |           |
|----|-----------|-----------|-----------|
| Co | 0.000000  | 0.000000  | 0.000000  |
| N  | -1.405273 | 1.230515  | -0.159073 |
| N  | 1.305466  | 1.421371  | -0.018066 |
| N  | 1.305191  | -1.415314 | -0.148926 |
| N  | -1.411148 | -1.230682 | -0.008240 |
| C  | -2.756851 | 0.685837  | -0.440247 |
| C  | -3.696945 | 1.799240  | 0.037796  |
| C  | -2.845642 | 3.070419  | -0.176315 |
| C  | -1.433014 | 2.539368  | -0.060852 |
| C  | -0.253189 | 3.312012  | 0.094940  |
| C  | 1.009613  | 2.773682  | 0.084000  |
| C  | 2.279312  | 3.589386  | 0.192841  |
| C  | 3.392975  | 2.557861  | -0.035187 |
| C  | 2.651474  | 1.242523  | -0.054413 |
| C  | 3.285095  | 0.006317  | -0.127625 |
| C  | 2.651031  | -1.229843 | -0.195129 |
| C  | 3.395172  | -2.536591 | -0.333023 |
| C  | 2.272583  | -3.568268 | -0.508377 |
| C  | 1.008286  | -2.762192 | -0.307968 |
| C  | -0.253159 | -3.302597 | -0.315460 |
| C  | -1.435867 | -2.534103 | -0.164169 |
| C  | -2.851654 | -3.066925 | -0.133118 |
| C  | -3.696045 | -1.787521 | -0.321594 |
| C  | -2.772827 | -0.686813 | 0.217743  |
| H  | -2.840286 | 0.546860  | -1.534424 |
| H  | -3.913803 | 1.668503  | 1.108871  |
| H  | -4.648209 | 1.822479  | -0.506805 |
| H  | -3.050903 | 3.867889  | 0.549637  |
| H  | -2.997025 | 3.499420  | -1.180954 |
| H  | -0.350067 | 4.393692  | 0.188797  |
| H  | 2.345215  | 4.052261  | 1.188492  |
| H  | 2.289810  | 4.406662  | -0.539261 |
| H  | 4.167206  | 2.570221  | 0.743454  |
| H  | 3.906540  | 2.708496  | -0.996628 |
| H  | 4.375290  | 0.008179  | -0.165283 |
| H  | 4.000168  | -2.722855 | 0.566986  |
| H  | 4.091644  | -2.506424 | -1.181641 |
| H  | 2.331604  | -4.397919 | 0.207977  |
| H  | 2.276215  | -4.013077 | -1.513672 |
| H  | -0.349884 | -4.378662 | -0.459976 |
| H  | -3.042191 | -3.542725 | 0.843384  |
| H  | -3.027191 | -3.829269 | -0.903168 |
| H  | -3.887451 | -1.619949 | -1.392334 |
| H  | -4.660950 | -1.830307 | 0.196838  |
| H  | -2.900970 | -0.553207 | 1.307556  |
| O  | -0.045486 | 0.016113  | 2.327423  |
| H  | 0.454742  | 0.806503  | 2.607925  |
| H  | 0.522110  | -0.732437 | 2.593903  |

**Table S9.** PBE/TZP-optimized Cartesian coordinates of four-coordinate base-off Co<sup>2+</sup>Cbl

|    |           |           |           |
|----|-----------|-----------|-----------|
| Co | 0.000000  | 0.000000  | 0.000000  |
| N  | -1.408340 | 1.228256  | -0.080490 |
| N  | 1.301987  | 1.414978  | 0.068817  |
| N  | 1.303116  | -1.414413 | -0.069946 |
| N  | -1.407944 | -1.228607 | 0.079315  |
| C  | -2.768387 | 0.686569  | -0.330170 |
| C  | -3.695694 | 1.793518  | 0.186981  |
| C  | -2.847198 | 3.068069  | -0.013412 |
| C  | -1.432846 | 2.536194  | 0.052231  |
| C  | -0.254303 | 3.305557  | 0.207123  |
| C  | 1.006485  | 2.764343  | 0.201508  |
| C  | 2.272324  | 3.572693  | 0.369598  |
| C  | 3.390289  | 2.545685  | 0.149673  |
| C  | 2.649078  | 1.234406  | 0.071671  |
| C  | 3.284363  | 0.001465  | -0.007751 |
| C  | 2.649948  | -1.232224 | -0.081894 |
| C  | 3.393005  | -2.542053 | -0.167358 |
| C  | 2.274139  | -3.574844 | -0.353882 |
| C  | 1.008270  | -2.764496 | -0.195602 |
| C  | -0.252411 | -3.306000 | -0.201447 |
| C  | -1.431549 | -2.536667 | -0.052444 |
| C  | -2.846024 | -3.068924 | 0.007370  |
| C  | -3.694031 | -1.794662 | -0.197021 |
| C  | -2.769211 | -0.687363 | 0.323639  |
| H  | -2.881653 | 0.555038  | -1.422379 |
| H  | -3.895416 | 1.640533  | 1.258347  |
| H  | -4.656021 | 1.829834  | -0.340317 |
| H  | -3.033722 | 3.846176  | 0.737885  |
| H  | -3.020157 | 3.523880  | -1.002518 |
| H  | -0.350906 | 4.384079  | 0.330795  |
| H  | 2.304886  | 4.003387  | 1.380966  |
| H  | 2.306320  | 4.410828  | -0.337692 |
| H  | 4.137665  | 2.533432  | 0.953796  |
| H  | 3.935440  | 2.718491  | -0.790482 |
| H  | 4.374893  | 0.002090  | -0.011856 |
| H  | 3.964020  | -2.706528 | 0.758545  |
| H  | 4.118744  | -2.531998 | -0.991348 |
| H  | 2.313950  | -4.392731 | 0.376740  |
| H  | 2.299927  | -4.034393 | -1.352402 |
| H  | -0.348495 | -4.385010 | -0.321243 |
| H  | -3.023285 | -3.524734 | 0.995697  |
| H  | -3.028900 | -3.847061 | -0.744827 |
| H  | -3.889206 | -1.642075 | -1.269287 |
| H  | -4.656631 | -1.831039 | 0.326172  |
| H  | -2.886734 | -0.555832 | 1.415405  |
